# Supplementary material for: Area difference between monolayers facilitates budding of lipid droplets from vesicles
Source: Royal Society of Chemistry journal article supplement (doi:10.1039/d3sm00728f), 2023-01-01
Supplement: d3sm00728f1.pdf [file d3sm00728f1.pdf]

**Supplementary Material for**  
**“Area difference between monolayers facilitates budding of lipid droplets from vesicles”**  
Meng Wang and Xin Yi  
Department of Mechanics and Engineering Science, College of Engineering,  
Peking University, Beijing 100871, China

**Note 1. Budding of embedded lipid droplets (LDs) from vesicles with  $A_{\text{out}}^0 / A_{\text{in}}^0 \geq 1$**

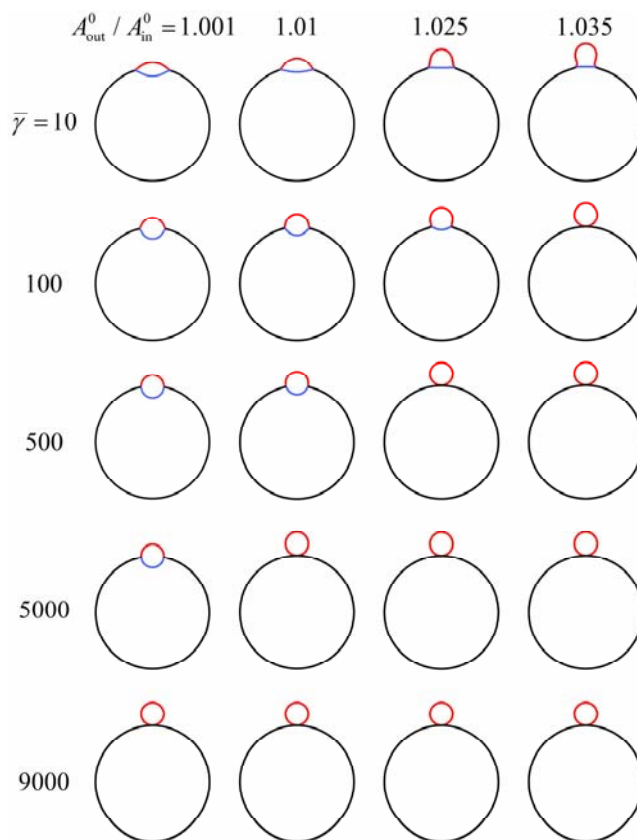

**Fig. S1** Selected LD-vesicle configurations for different values of  $\bar{\gamma}$  and  $\bar{p}$  with vesicle radius  $R=5a$  and normalized osmotic pressure  $\bar{p}=10$ .

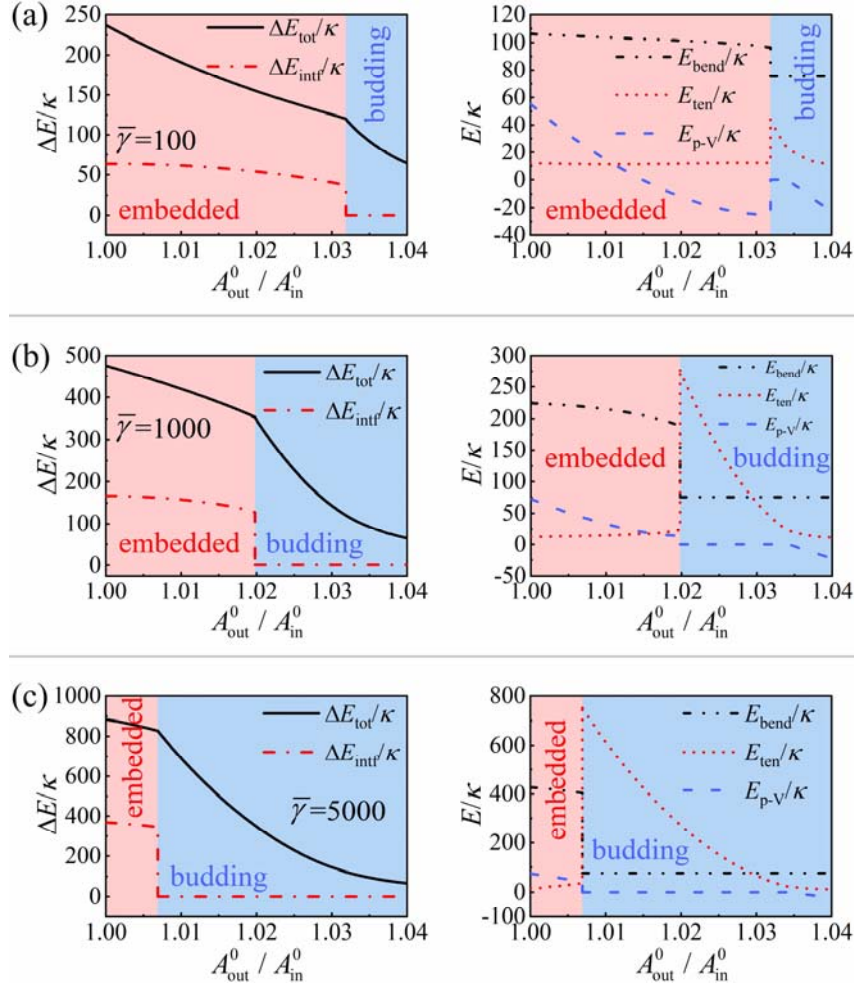

**Fig. S2** Normalized total free energy variation  $\Delta E_{\text{tot}} = E_{\text{tot}} - 4\pi\gamma a^2$  and its components ( $E_{\text{bend}}$ ,  $E_{\text{ten}}$ , and  $E_{\text{p-v}}$ ), and interfacial energy variation  $\Delta E_{\text{intf}} = E_{\text{intf}} - 4\pi\gamma a^2$  versus monolayer area ratio  $A_{\text{out}}^0/A_{\text{in}}^0$  at  $R=5a$  and  $\bar{p}=10$  for  $\bar{\gamma}=100$  (a), 1000 (b), and 5000 (c).

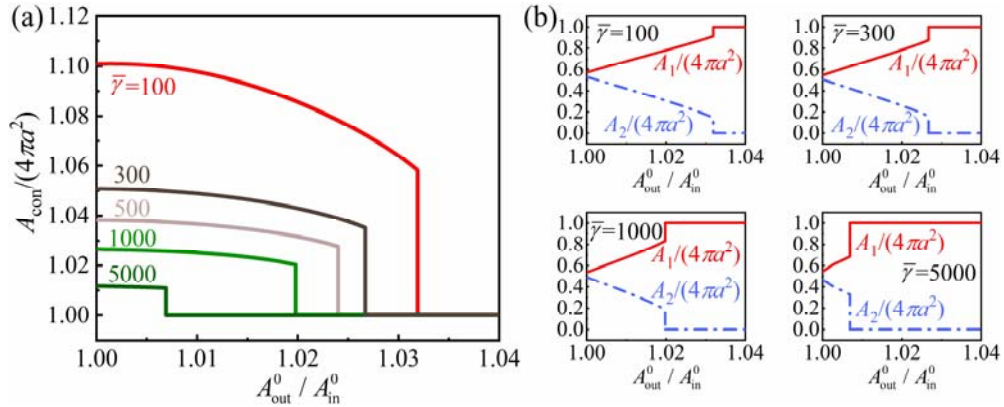

**Fig. S3** The LD-vesicle contact area  $A_{\text{c}}=A_1+A_2$  (a) and outer ( $A_1$ ) and inner ( $A_2$ ) contact areas (b) versus monolayer area ratio  $A_{\text{out}}^0/A_{\text{in}}^0$  for different values of  $\bar{\gamma}$  at  $R=5a$  and  $\bar{p}=10$ .

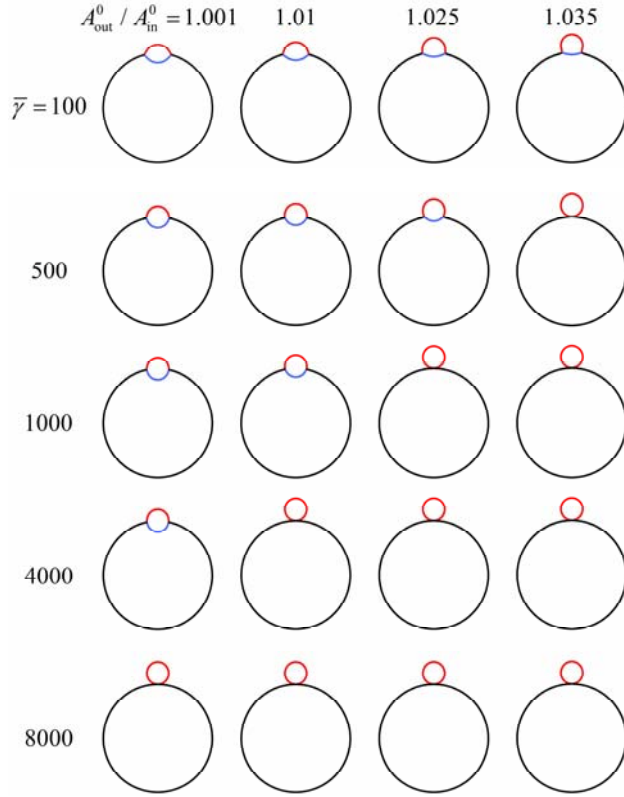

**Fig. S4** Selected LD-vesicle configurations for different values of  $\bar{\gamma}$  and  $\bar{p}$  with vesicle radius  $R=5a$  and normalized osmotic pressure  $\bar{p} = 30$ .

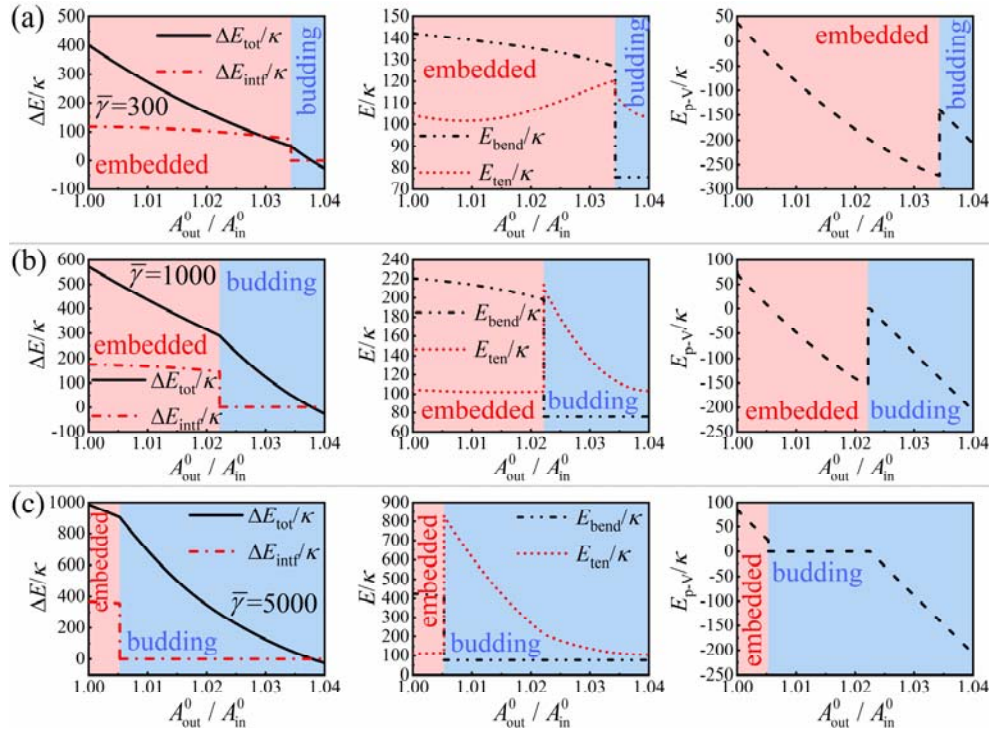

**Fig. S5** Normalized total free energy  $E_{\text{tot}}$  and its components ( $E_{\text{bend}}$ ,  $E_{\text{ten}}$ , and  $E_{\text{p-v}}$ ), and interfacial energy variation  $\Delta E_{\text{intf}} = E_{\text{intf}} - 4\pi\gamma a^2$  versus monolayer area ratio  $A_{\text{out}}^0 / A_{\text{in}}^0$  at  $R=5a$  and  $\bar{p} = 30$  for  $\bar{\gamma} = 300$  (a), 1000 (b), and 5000 (c).

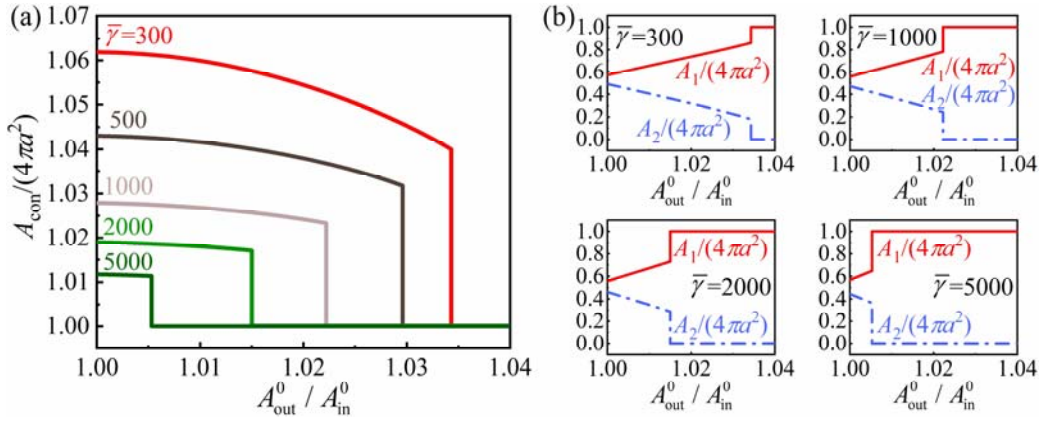

**Fig. S6** The LD-vesicle contact area  $A_c=A_1+A_2$  (a) and outer ( $A_1$ ) and inner ( $A_2$ ) contact areas (b) versus monolayer area ratio  $A_{\text{out}}^0/A_{\text{in}}^0$  for different values of  $\bar{\gamma}$  at  $R=5a$  and  $\bar{p}=30$ .

**Note 2. Budding of embedded LDs from vesicles with  $A_{\text{out}}^0/A_{\text{in}}^0 \leq 1$**

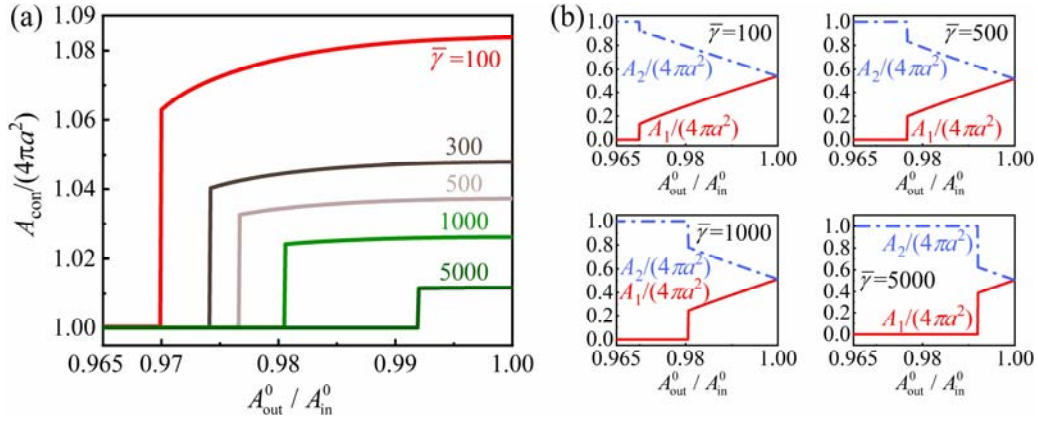

**Fig. S7** The LD-vesicle contact area  $A_c=A_1+A_2$  (a) and outer ( $A_1$ ) and inner ( $A_2$ ) contact areas (b) versus monolayer area ratio  $A_{\text{out}}^0/A_{\text{in}}^0$  for different values of  $\bar{\gamma}$  at  $R=5a$  and  $\bar{p}=0$ .

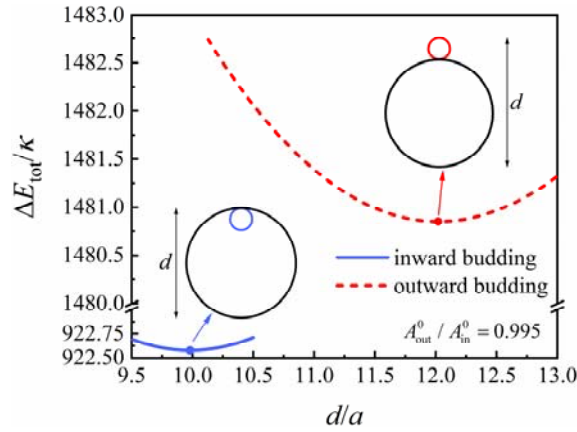

**Fig. S8** Total free energy variations  $\Delta E_{\text{tot}}=E_{\text{tot}}-4\pi\gamma a^2$  versus distance  $d$  between two poles of the LD-vesicle complex for outward and inward budding at  $\bar{\gamma}=5000$ ,  $A_{\text{out}}^0/A_{\text{in}}^0=0.995$ ,  $R=5a$ , and  $\bar{p}=0$ . Local minimum values of  $E_{\text{tot}}$  in the outward and inward budding states can be well determined by Eqs. (5) and (7), respectively.
